# Supplementary material
Source: PubMed Central journal article supplement (PMC3571304)
Supplement: EC.00163-12_zek999094041so1.pdf [file EC.00163-12_zek999094041so1.pdf]

**Table S1****Primers used in this study**

| #  | Primer Name | Sequence                                         | Description                                                          |
|----|-------------|--------------------------------------------------|----------------------------------------------------------------------|
| 1  | DKO501      | gctatgatgaacaggtaccCATTGCACTAACCCGAACA<br>CC     | 5' <i>EFG1</i> flank upstream<br>primer for cloning into<br>pSFS2    |
| 2  | DKO502      | gagtccatgatcactcgagATGGGTAAAGGGTTGGTTG<br>G      | 3' <i>EFG1</i> flank upstream<br>primer for cloning into<br>pSFS2    |
| 3  | DKO503      | gatcataccgaacagagcgccgcG TTCAGTTCACCCTTC<br>ACCC | 5' <i>EFG1</i> flank downstream<br>primer for cloning into<br>pSFS2  |
| 4  | DKO504      | catgattcgtagaccgcgGGAAAAGACAATGACTTA<br>CACAC    | 3' <i>EFG1</i> flank downstream<br>primer for cloning into<br>pSFS2  |
| 5  | MBO72       | gctatgatgaacaggtaccGATGAAGGAATTGTCCATG<br>GC     | 5' <i>SUN41</i> flank upstream<br>primer for cloning into<br>pSFS2   |
| 6  | MBO73       | gagtccatgatcactcgagCGAATGTACAGTTGAGAC            | 3' <i>SUN41</i> flank upstream<br>primer for cloning into<br>pSFS2   |
| 7  | MBO74       | gatcataccgaacagagcgccgcGAGAAAAGTACAAGA<br>TACCC  | 5' <i>SUN41</i> flank<br>downstream primer for<br>cloning into pSFS2 |
| 8  | MBO75       | catgattcgtagaccgcgGTGGTTTCCAATGATGGCA<br>CGG     | 3' <i>SUN41</i> flank<br>downstream primer for<br>cloning into pSFS2 |
| 9  | DKO239      | GTTGGGACTAGGATTGGTAAAGC                          | 5' primer for <i>UME6</i> probe                                      |
| 10 | DKO240      | GATGTGGAGTAGACTTGGATAATGG                        | 3' primer for <i>UME6</i> probe                                      |
| 11 | DKO523      | GTTGACCGAAGCTCCAATGAATCC                         | 5' primer for <i>ACT1</i> probe                                      |
| 12 | DKO526      | CAGCAATACCTGGGAACATGG                            | 3' primer for <i>ACT1</i> probe                                      |
| 13 | DTO15       | GACCAAGCACCTACTGTTCC                             | 5' primer for <i>ECE1</i> probe                                      |
| 14 | DTO16       | GATCTAGTAATGAGTTGTGG                             | 3' primer for <i>ECE1</i> probe                                      |
| 15 | DTO19       | CAGGAAGAACCTTGTGATTACC                           | 5' primer for <i>HWPI</i> probe                                      |
| 16 | DTO20       | GTTGGAACAGAAGTGTTTGG                             | 3' primer for <i>HWPI</i> probe                                      |
| 17 | PCO6        | CAGAACCAACTGTATCG                                | 5' primer for <i>PHR1</i> probe                                      |
| 18 | PCO7        | CTTCGTCATCATTGGATG                               | 3' primer for <i>PHR1</i> probe                                      |
| 19 | PCO8        | CTCATCATCATAGTTCTACCG                            | 5' primer for <i>HGCI</i> probe                                      |
| 20 | PCO9        | GCACGAGAACCAGCGATAC                              | 3' primer for <i>HGCI</i> probe                                      |

|    |         |                                                    |                                                                                               |
|----|---------|----------------------------------------------------|-----------------------------------------------------------------------------------------------|
| 21 | DTO23   | GTGAAGAACATACCTATGG                                | 5' primer for <i>RBT4</i> probe                                                               |
| 22 | DTO24   | GTCCTTACCAGCTTCTTCG                                | 3' primer for <i>RBT4</i> probe                                                               |
| 23 | DTO21   | GAGAGAAGCTGAAATTGCC                                | 5' primer for <i>RBT1</i> probe                                                               |
| 24 | DTO22   | GGCTTTGACTTGAGCATTG                                | 3' primer for <i>RBT1</i> probe                                                               |
| 25 | MBO18a  | AGGCAATGCTAGCCAACAGC                               | 5' primer for <i>EFG1</i> probe                                                               |
| 26 | MBO19a  | ATTAGCTTGATGTTGTTGGGG                              | 3' primer for <i>EFG1</i> probe                                                               |
| 27 | MBO76   | ACGACTACGCTTATGTTACCG                              | 5' primer for <i>SUN41</i> probe                                                              |
| 28 | MBO77   | CTAACGGTAGAGCCTGATTCACC                            | 3' primer for <i>SUN41</i> probe                                                              |
| 29 | MBO115  | gctatgatgaacaggtaccTAGAATTTCCCGGGAGTTG<br>C        | 5' primer to generate the<br><i>UME6</i> -650 to -122<br>fragment for cloning into<br>pJK1000 |
| 30 | MBO116  | gagtccatgatcagggccAACAGTAATAAGTGAGTTG<br>TTG       | 3' primer to generate the<br><i>UME6</i> -650 to -122<br>fragment for cloning into<br>pJK1000 |
| 31 | MBO117  | catgattcgtagaccgcccCTCAATTTACTTCCAATT<br>AG        | 5' primer to generate the<br><i>UME6</i> -45 to +443<br>fragment for cloning into<br>pJK1000  |
| 32 | MBO118  | gatcataccgaacagagcccatggGGTGGCTGTGGTTGCA<br>AATCAC | 3' primer to generate the<br><i>UME6</i> -45 to +443<br>fragment for cloning into<br>pJK1000  |
| 33 | *MBO84  | ATGACACCATGTCAAGTTCAGA                             | Forward primer for <i>ALS3</i><br>probe <sup>1</sup>                                          |
| 34 | *MBO158 | CACACCAAATTGGAGGTGATT                              | Reverse primer for <i>ALS3</i><br>probe <sup>1</sup>                                          |

Note: Lowercase bases indicate flanking sequences within primers that contain restriction sites for cloning.

\*these primers were used to generate a 1017 bp fragment which was cleaved with *HincII* to yield a 758 bp *ALS3*-specific probe, as described previously<sup>1</sup>.

## Reference

1. Hoyer, L.L., Payne, T.L., Bell, M., Myers, A.M. and S. Scherer. 1998. *Candida albicans ALS3* and insights into the nature of the *ALS* gene family. *Curr Genet* 33:451-459.

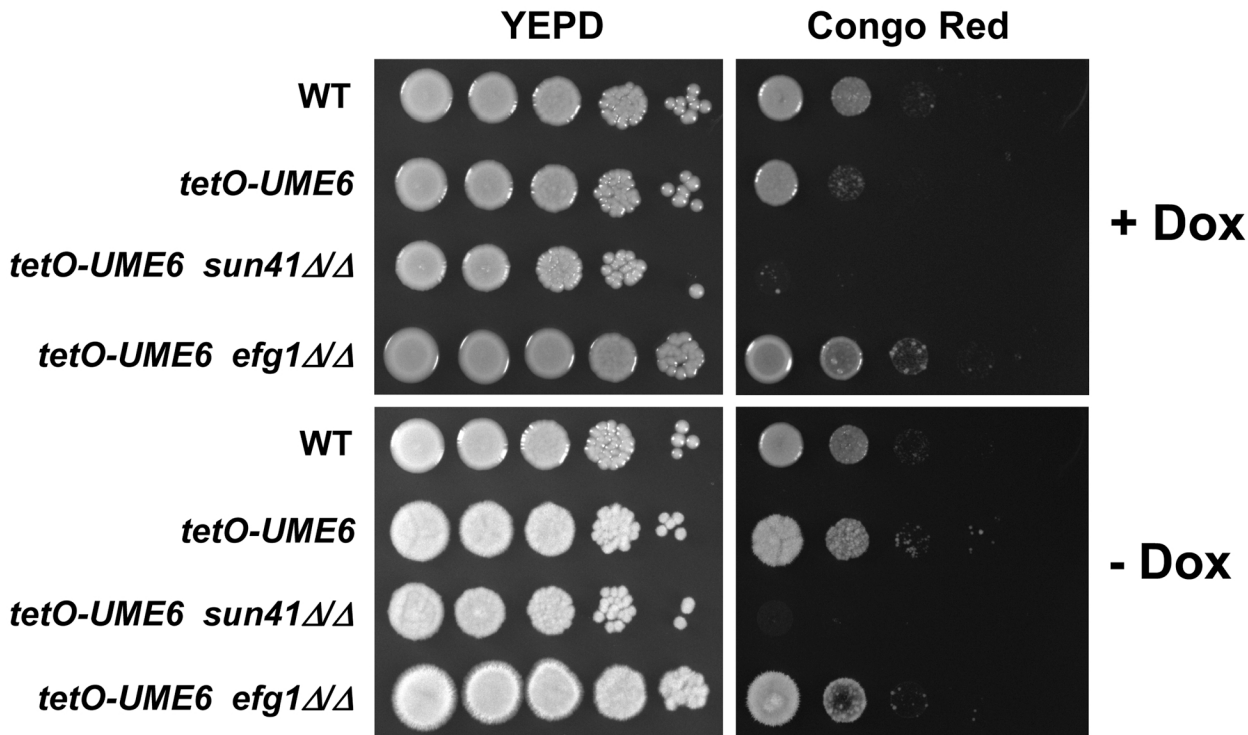

**FIG S1.** The *tetO-UME6 sun41Δ/Δ* mutant is hypersensitive to the cell wall inhibitor Congo Red.  $6 \times 10^4$  cells (left columns) and subsequent 10-fold dilutions (remaining columns) of the indicated strains were spotted on YEPPD or YEPPD + 200  $\mu\text{g}/\text{mL}$  Congo Red in the presence or absence of 20  $\mu\text{g}/\text{mL}$  Dox and grown at 30°C for 24 hrs.

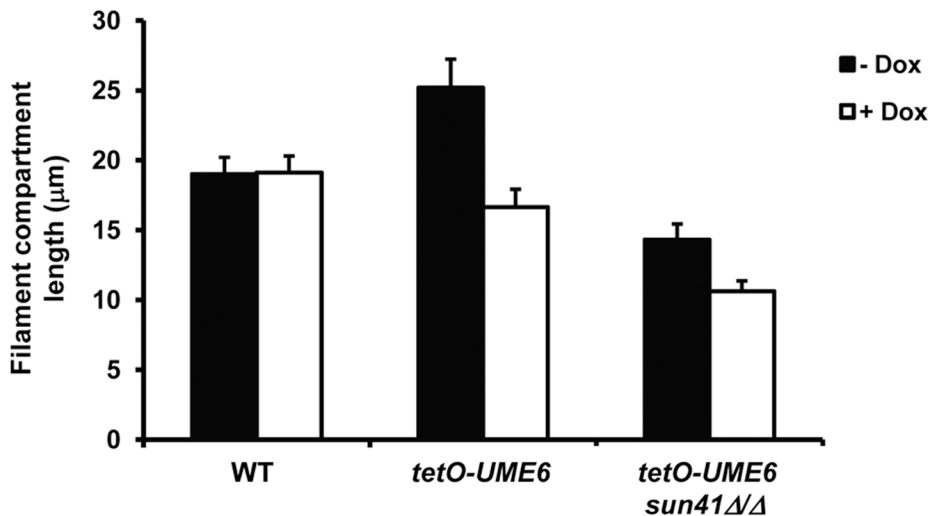

**FIG S2.** Deletion of Sun41 causes a reduction in filament compartment length of the *tetO-UME6* strain during biofilm formation.  $1 \times 10^6$  cells/mL suspensions of the indicated strains were allowed to form biofilms under static conditions for 24 hrs. at 37°C on 24-well polystyrene plates in YNB medium with amino acids + 2% dextrose in the presence or absence of 20 μg/mL Dox. A portion of the topmost layer of each biofilm was placed on a glass slide and stained with 1 mg/ml Calcofluor White (CFW) in 10% KOH. A Leica DMI6000 microscope was used for examination of the CFW-stained cells and the microscope images were acquired and analyzed using Surveyor software (Objective Imaging, Cambridge, UK). Filament compartment length for each strain was determined by measuring the mean distance between septa ( $n \geq 4$ ). Error bars represent standard deviation.
